# Supplementary material for: Estimating population-based incidence of community-acquired pneumonia and acute otitis media in children and adults in Ontario and British Columbia using health administrative data, 2005–2018: a Canadian Immunisation Research Network (CIRN) study
Source: PubMed Central journal article supplement — BMJ Open Respir Res. 2022 Jun 27;9(1):e001218. doi: 10.1136/bmjresp-2022-001218 (PMC9240885; doi:10.1136/bmjresp-2022-001218), 2022-06-27
Supplement: bmjresp-2022-001218supp001.pdf [file bmjresp-2022-001218supp001.pdf]

**Supplementary tables:**

Supplementary Table 1: Diagnostic codes used to identify community-acquired pneumonia and acute otitis media in Ontario and British Columbia

| <b>Study Outcome and Diagnosis</b>                | <b>ICD-9/OHIP fee codes for outpatient physician consultation in primary care settings</b> | <b>ICD-10 codes for hospitalization or emergency department visit</b> |
|---------------------------------------------------|--------------------------------------------------------------------------------------------|-----------------------------------------------------------------------|
| <b>Community-Acquired Pneumonia (CAP)</b>         |                                                                                            |                                                                       |
| Pneumococcal pneumonia                            | 481                                                                                        | J13                                                                   |
| Bronchopneumonia and lobar pneumonia, unspecified | 482                                                                                        | J18.0, J18.1                                                          |
| Other pneumonia                                   | 483, 484, 485, 486                                                                         | J14, J15, J16, J17, J10.0, J11.0                                      |
| Viral pneumonia                                   | 480                                                                                        | J12                                                                   |
| Empyema                                           | 510                                                                                        | J86.9                                                                 |
| Abscess of lung with pneumonia                    | 513                                                                                        | J85.1                                                                 |
| <b>Acute Otitis Media (AOM)</b>                   |                                                                                            |                                                                       |
| Acute suppurative otitis media                    | 382                                                                                        | H66.0                                                                 |
| Acute serous otitis media                         | 381                                                                                        | H65.0                                                                 |
| Other acute nonsuppurative otitis media           | 381                                                                                        | H65.1                                                                 |

OHIP, Ontario Health Insurance Plan

Supplementary Table 2: Distribution of study outcomes across different databases in Ontario and British Columbia, 2002–2018

| Database, healthcare setting*                           | Community-acquired pneumonia, n (%) | Bacterial community-acquired pneumonia, n (%) | Acute otitis media, n (%) | Acute suppurative otitis media, n (%) |
|---------------------------------------------------------|-------------------------------------|-----------------------------------------------|---------------------------|---------------------------------------|
| <b>Ontario</b>                                          |                                     |                                               |                           |                                       |
| DAD, hospitalization                                    | 59,023 (1.6)                        | 69,476 (40.3)                                 | 784 (0.0)                 | 324 (0.0)                             |
| NACRS, emergency department visit                       | 31,006 (0.9)                        | 90,806 (52.7)                                 | 14,255 (0.2)              | 9,312 (0.3)                           |
| OHIP, outpatient physician consultation in primary care | 3,277,263 (90.9)                    | 265 (0.2)                                     | 7,981,536 (99.4)          | 3,304,410 (99.5)                      |
| >1 database                                             | 239,832 (6.6)                       | 11,743 (6.8)                                  | 30,396 (0.4)              | 5,624 (0.2)                           |
| Total                                                   | 3,607,124                           | 172,290                                       | 8,026,971                 | 3,319,670                             |
| <b>British Columbia</b>                                 |                                     |                                               |                           |                                       |
| DAD, hospitalization                                    | 20,737 (2.1)                        | 19,160 (6.0)                                  | 426 (0.0)                 | 93 (0.0)                              |
| MSP, outpatient physician consultation in primary care  | 907,272 (93.5)                      | 288,612 (90.8)                                | 2,021,739 (100.0)         | 1,442,216 (100.0)                     |
| >1 database                                             | 42,446 (4.4)                        | 10,141 (3.2)                                  | 706 (0.0)                 | 102 (0)                               |
| Total                                                   | 970,455                             | 317,913                                       | 2,022,871                 | 1,442,411                             |

\*Outcome counts in different dataset rows are mutually exclusive.

Abbreviations: DAD, Discharge Abstract Database; NACRS, National Ambulatory Care Reporting System; OHIP, Ontario Health Insurance Plan; MSP, Medical Services Plan.

Supplementary Table 3: Age and sex distribution of estimated bacterial community-acquired pneumonia, pneumococcal pneumonia and acute suppurative otitis media in Ontario and British Columbia, 2005–2018

| Characteristics         | Bacterial community-acquired pneumonia, n (%) | Pneumococcal pneumonia |                        | Acute suppurative otitis media, n (%) |
|-------------------------|-----------------------------------------------|------------------------|------------------------|---------------------------------------|
|                         |                                               | Hospitalized, n (%)    | Nonhospitalized, n (%) |                                       |
| <b>Ontario</b>          |                                               |                        |                        |                                       |
| <b>Total cases, N</b>   | 172,290                                       | 7,293                  | 521                    | 3,319,670                             |
| <b>Sex</b>              |                                               |                        |                        |                                       |
| Female                  | 83,412 (48)                                   | 3,101 (42.5)           | 226 (43.4)             | 1,669,573 (50)                        |
| Male                    | 88,878 (52)                                   | 4,192 (57.5)           | 295 (56.6)             | 1,650,097 (50)                        |
| <b>Age group</b>        |                                               |                        |                        |                                       |
| 0–4 years               | 22,084 (13)                                   | 338 (4.6)              | 44 (8.4)               | 1,348,564 (41)                        |
| 5–17 years              | 10,416 (6)                                    | 221 (3.0)              | 36 (6.9)               | 893,443 (27)                          |
| 18–39 years             | 15,374 (9)                                    | 654 (9.0)              | 106 (20.3)             | 462,689 (14)                          |
| 40–64 years             | 39,091 (23)                                   | 2,877 (39.4)           | 197 (37.8)             | 451,855 (14)                          |
| 65–74 years             | 25,229 (15)                                   | 1,439 (19.7)           | 56 (10.7)              | 91,600 (3)                            |
| 75–84 years             | 32,762 (19)                                   | 1,154 (15.8)           | 54 (10.4)              | 53,304 (2)                            |
| ≥85 years               | 27,334 (16)                                   | 610 (8.4)              | 28 (5.4)               | 18,215 (1)                            |
| <b>British Columbia</b> |                                               |                        |                        |                                       |
| <b>Total cases, N</b>   | 317,913                                       | 3,730                  | 31,557                 | 1,442,411                             |
| <b>Sex</b>              |                                               |                        |                        |                                       |
| Female                  | 159,001 (50)                                  | 1,511 (40.5)           | 16,528 (52.4)          | 739,143 (51)                          |
| Male                    | 158,912 (50)                                  | 2,219 (59.5)           | 15,029 (47.6)          | 703,268 (49)                          |
| <b>Age group</b>        |                                               |                        |                        |                                       |
| 0–4 years               | 21,144 (7)                                    | 135 (3.6)              | 2,082 (6.6)            | 399,511 (28)                          |
| 5–17 years              | 22,166 (7)                                    | 132 (3.5)              | 2,480 (7.9)            | 460,082 (32)                          |
| 18–39 years             | 32,924 (10)                                   | 469 (12.6)             | 3,746 (11.9)           | 243,938 (17)                          |
| 40–64 years             | 84,368 (27)                                   | 1,518 (40.7)           | 9,151 (29.0)           | 242,860 (17)                          |
| 65–74 years             | 50,595 (16)                                   | 650 (17.4)             | 5,024 (15.9)           | 53,224 (4)                            |
| 75–84 years             | 56,143 (18)                                   | 542 (14.5)             | 4,972 (15.8)           | 30,627 (2)                            |
| ≥85 years               | 50,573 (16)                                   | 284 (7.6)              | 4,102 (13.0)           | 12,169 (1)                            |

Supplementary Table 4: Annual incidence of community-acquired pneumonia and acute otitis media in Ontario and British Columbia, 2005–2018

| Year | Incidence per 100,000 population (95% Confidence Interval) |                         |                                        |                      |                              |                         |                                        |                       |
|------|------------------------------------------------------------|-------------------------|----------------------------------------|----------------------|------------------------------|-------------------------|----------------------------------------|-----------------------|
|      | Ontario                                                    |                         |                                        |                      | British Columbia             |                         |                                        |                       |
|      | Community-acquired pneumonia                               |                         | Bacterial community-acquired pneumonia |                      | Community-acquired pneumonia |                         | Bacterial community-acquired pneumonia |                       |
|      | Crude rate                                                 | Adjusted rate           | Crude rate                             | Adjusted rate        | Crude rate                   | Adjusted rate           | Crude rate                             | Adjusted rate         |
| 2005 | 2041.1 (2033.2, 2049.0)                                    | 3077.4 (2872.5, 3296.8) | 118.2 (116.3, 120.1)                   | 178.5 (167.5, 190.3) | 1507.8 (1496.1, 1519.6)      | 2214.1 (2048.1, 2393.5) | 307.2 (302.0, 312.6)                   | 441.6 (386.4, 504.6)  |
| 2006 | 1939.6 (1931.9, 1947.3)                                    | 2903.4 (2706.3, 3114.7) | 94.1 (92.4, 95.8)                      | 140.4 (130.8, 150.7) | 1391.5 (1380.4, 1402.8)      | 2027.0 (1869.9, 2197.2) | 296.3 (291.2, 301.6)                   | 421.5 (368.3, 482.5)  |
| 2007 | 1882.6 (1875.1, 1890.1)                                    | 2801.7 (2609.6, 3008.0) | 81.7 (80.2, 83.3)                      | 120.8 (111.9, 130.3) | 1421.5 (1410.3, 1432.8)      | 2058.4 (1901.4, 2228.4) | 314.8 (309.5, 320.1)                   | 444.5 (390.2, 506.3)  |
| 2008 | 1832.3 (1824.9, 1839.7)                                    | 2710.3 (2522.9, 2911.7) | 84.6 (83, 86.2)                        | 123.7 (114.9, 133.3) | 1466.5 (1455.2, 1478.0)      | 2114.2 (1956.3, 2284.8) | 338.0 (332.6, 343.5)                   | 474.7 (418.9, 537.9)  |
| 2009 | 1906.6 (1899.1, 1914.1)                                    | 2804.4 (2614.9, 3007.6) | 88.4 (86.8, 90.1)                      | 128.2 (119.3, 137.8) | 1403.4 (1392.4, 1414.5)      | 2013.4 (1860.9, 2178.4) | 337.2 (331.8, 342.7)                   | 470.6 (415.6, 532.8)  |
| 2010 | 1780.1 (1772.9, 1787.3)                                    | 2603.6 (2422.7, 2798.0) | 77.9 (76.4, 79.4)                      | 111.9 (103.6, 120.8) | 1376.0 (1365.2, 1387.0)      | 1963.5 (1814.3, 2125.1) | 360.9 (355.4, 366.6)                   | 500.5 (444.2, 563.9)  |
| 2011 | 1952.6 (1945.1, 1960.2)                                    | 2839.9 (2652.0, 3041.0) | 79.6 (78.1, 81.2)                      | 113.3 (105.1, 122.2) | 1525.9 (1514.5, 1537.3)      | 2161.7 (2005.9, 2329.5) | 431.2 (425.1, 437.3)                   | 592.6 (531.5, 660.7)  |
| 2012 | 1939.3 (1931.9, 1946.8)                                    | 2802.8 (2617.6, 3001.0) | 80.8 (79.3, 82.3)                      | 113.8 (105.6, 122.6) | 1458.4 (1447.3, 1469.5)      | 2055.2 (1905.0, 2217.4) | 497.2 (490.8, 503.7)                   | 678.8 (613.8, 750.7)  |
| 2013 | 1831.2 (1824.0, 1838.4)                                    | 2631.1 (2453.2, 2821.9) | 72.6 (71.2, 74.1)                      | 101.2 (93.6, 109.4)  | 1589.7 (1578.3, 1601.2)      | 2227.1 (2071.9, 2394.0) | 577.2 (570.3, 584.1)                   | 782.0 (712.7, 858.1)  |
| 2014 | 1964.4 (1956.9, 1971.8)                                    | 2807.2 (2624.4, 3002.7) | 87.8 (86.3, 89.4)                      | 121.3 (113, 130.2)   | 1566.9 (1555.6, 1578.3)      | 2184.5 (2032.4, 2348.0) | 603.9 (597.0, 611.0)                   | 813.1 (743.1, 889.7)  |
| 2015 | 1938.0 (1930.7, 1945.4)                                    | 2754.5 (2574.6, 2947.0) | 101.1 (99.4, 102.8)                    | 138.4 (129.6, 147.8) | 1599.6 (1588.3, 1611.0)      | 2217.0 (2065.2, 2379.9) | 632.9 (625.8, 640.1)                   | 846.0 (775.2, 923.1)  |
| 2016 | 1988.2 (1980.7, 1995.6)                                    | 2812.1 (2631.7, 3004.8) | 105.7 (104, 107.4)                     | 143.4 (134.5, 152.9) | 1646.1 (1634.7, 1657.5)      | 2268.5 (2116.6, 2431.4) | 679.2 (671.9, 686.6)                   | 901.8 (829.4, 980.4)  |
| 2017 | 2014.5 (2007.0, 2021.9)                                    | 2839.8 (2660, 3031.7)   | 106.3 (104.6, 108)                     | 143.3 (134.5, 152.7) | 1653.8 (1642.5, 1665.2)      | 2266.0 (2115.5, 2427.1) | 718.0 (710.5, 725.5)                   | 946.4 (872.9, 1026.1) |
| 2018 | 2020.5 (2013.2, 2027.9)                                    | 2842.6 (2664.4, 3032.7) | 111.0 (109.3, 112.7)                   | 148.9 (140.0, 158.4) | 1595.8 (1584.7, 1606.9)      | 2175.8 (2029.9, 2332.2) | 749.3 (741.7, 756.9)                   | 981.3 (907.2, 1061.5) |
| Mean | 1931.8 (1929.8, 1933.8)                                    | 2800.5 (2748.4, 2853.6) | 92.3 (91.8, 92.7)                      | 130.5 (128.0, 133.0) | 1518.6 (1515.6, 1521.6)      | 2143.5 (2100.3, 2187.5) | 497.5 (495.7, 499.2)                   | 680.4 (661.7, 699.6)  |
|      | Pneumococcal pneumonia                                     |                         |                                        |                      | Pneumococcal pneumonia       |                         |                                        |                       |
|      | Hospitalized                                               |                         | Nonhospitalized                        |                      | Hospitalized                 |                         | Nonhospitalized                        |                       |

|      | Crude rate              | Adjusted rate           | Crude rate                     | Adjusted rate           | Crude rate              | Adjusted rate           | Crude rate                     | Adjusted rate           |
|------|-------------------------|-------------------------|--------------------------------|-------------------------|-------------------------|-------------------------|--------------------------------|-------------------------|
| 2005 | 5.8 (5.3,6.3)           | 5.7 (5.2,6.2)           | 0.2 (0.1,0.3)                  | 0.3 (0.2,0.4)           | 7.1 (6.3, 7.9)          | 8.0 (6.9, 9.2)          | 45.1 (43.1, 47.2)              | 64.5 (58.3, 71.4)       |
| 2006 | 4.8 (4.4,5.2)           | 4.7 (4.3,5.2)           | 0.4 (0.3,0.5)                  | 0.4 (0.3,0.6)           | 6.5 (5.8, 7.3)          | 7.3 (6.2, 8.5)          | 37.1 (35.3, 39.0)              | 52.6 (47, 58.8)         |
| 2007 | 4.6 (4.2,5.0)           | 4.5 (4.1,5.0)           | 0.5 (0.3,0.6)                  | 0.5 (0.4,0.7)           | 7.3 (6.5, 8.1)          | 8.1 (7.0, 9.4)          | 46.2 (44.2, 48.3)              | 65.1 (58.9, 71.9)       |
| 2008 | 4.8 (4.4,5.3)           | 4.7 (4.2,5.1)           | 0.3 (0.2,0.4)                  | 0.4 (0.3,0.5)           | 6.5 (5.8, 7.3)          | 7.2 (6.2, 8.4)          | 50.5 (48.4, 52.7)              | 70.8 (64.4, 77.8)       |
| 2009 | 4.8 (4.4,5.2)           | 4.8 (4.4,5.3)           | 0.4 (0.3,0.5)                  | 0.5 (0.4,0.6)           | 5.5 (4.9, 6.3)          | 6.1 (5.2, 7.2)          | 48.8 (46.8, 50.9)              | 68.0 (61.9, 74.8)       |
| 2010 | 4.1 (3.7,4.5)           | 4.0 (3.6,4.4)           | 0.2 (0.1,0.3)                  | 0.3 (0.2,0.4)           | 5.1 (4.5, 5.8)          | 5.6 (4.7, 6.6)          | 49.1 (47.1, 51.2)              | 68.0 (61.9, 74.8)       |
| 2011 | 4.1 (3.8,4.5)           | 4.0 (3.6,4.4)           | 0.3 (0.2,0.4)                  | 0.3 (0.2,0.4)           | 5.3 (4.6, 6.0)          | 5.7 (4.9, 6.8)          | 53.2 (51.2, 55.4)              | 73.2 (66.9, 80.2)       |
| 2012 | 4.2 (3.8,4.6)           | 4.0 (3.6,4.4)           | 0.3 (0.2,0.4)                  | 0.3 (0.2,0.4)           | 5.5 (4.9, 6.2)          | 6.0 (5.1, 7.0)          | 48.8 (46.8, 50.9)              | 66.7 (60.7, 73.2)       |
| 2013 | 3.9 (3.6,4.3)           | 3.6 (3.3,4.0)           | 0.3 (0.2,0.4)                  | 0.3 (0.2,0.5)           | 5.4 (4.8, 6.1)          | 5.8 (5.0, 6.8)          | 55.3 (53.2, 57.5)              | 75.1 (68.8, 81.9)       |
| 2014 | 3.5 (3.1,3.8)           | 3.3 (2.9,3.6)           | 0.3 (0.2,0.4)                  | 0.4 (0.3,0.5)           | 5.1 (4.5, 5.7)          | 5.4 (4.6, 6.4)          | 48.0 (46.1, 50.0)              | 64.8 (59.1, 71.1)       |
| 2015 | 4.7 (4.3,5.2)           | 4.3 (3.9,4.7)           | 0.3 (0.2,0.5)                  | 0.4 (0.3,0.5)           | 5.2 (4.5, 5.8)          | 5.5 (4.6, 6.4)          | 48.2 (46.3, 50.2)              | 64.7 (59.0, 70.9)       |
| 2016 | 4.6 (4.3,5.1)           | 4.2 (3.9,4.6)           | 0.3 (0.2,0.4)                  | 0.3 (0.2,0.4)           | 5.7 (5.0, 6.4)          | 6.0 (5.1, 7.0)          | 48.5 (46.6, 50.5)              | 64.7 (59.1, 70.9)       |
| 2017 | 4.6 (4.2,5.0)           | 4.2 (3.8,4.6)           | 0.3 (0.2,0.4)                  | 0.3 (0.2,0.4)           | 5.9 (5.3, 6.6)          | 6.2 (5.3, 7.2)          | 49.1 (47.2, 51.1)              | 65.1 (59.5, 71.2)       |
| 2018 | 5.1 (4.7,5.5)           | 4.6 (4.3,5.1)           | 0.3 (0.2,0.4)                  | 0.3 (0.2,0.4)           | 6.1 (5.4, 6.8)          | 6.3 (5.5, 7.3)          | 60.8 (58.7, 63.0)              | 80.1 (74.0, 86.8)       |
| Mean | 4.5 (4.4,4.6)           | 4.3 (4.2,4.4)           | 0.3 (0.3,0.3)                  | 0.3 (0.3,0.4)           | 5.8 (5.7, 6.0)          | 6.3 (6.0, 6.6)          | 49.4 (48.8, 49.9)              | 67.6 (65.9, 69.3)       |
|      | Acute otitis media      |                         | Acute suppurative otitis media |                         | Acute otitis media      |                         | Acute suppurative otitis media |                         |
|      | Crude rate              | Adjusted rate           | Crude rate                     | Adjusted rate           | Crude rate              | Adjusted rate           | Crude rate                     | Adjusted rate           |
| 2005 | 5308.8 (5296.0, 5321.6) | 4192.4 (3874.4, 4536.5) | 2364.7 (2356.2, 2373.2)        | 1604.0 (1495.3, 1720.6) | 4118.3 (4098.9, 4137.7) | 3683.6 (3367.9, 4029.0) | 3141.9 (3125.0, 3158.9)        | 2501.9 (2309.7, 2710.2) |
| 2006 | 5081.1 (5068.7, 5093.5) | 4027.6 (3718.0, 4363.0) | 2269.4 (2261.1, 2277.7)        | 1545.7 (1439.8, 1659.5) | 3820.0 (3801.4, 3838.6) | 3432.8 (3130.0, 3764.8) | 2872.6 (2856.5, 2888.8)        | 2300.2 (2117.3, 2498.9) |
| 2007 | 4521 (4509.4, 4532.7)   | 3600.6 (3311.0, 3915.6) | 1986.2 (1978.5, 1993.9)        | 1360.3 (1262.3, 1465.8) | 3714.3 (3696.1, 3732.6) | 3353.6 (3055.7, 3680.5) | 2773.3 (2757.6, 2789.1)        | 2232.9 (2053.5, 2427.8) |
| 2008 | 4455.6 (4444.1, 4467.1) | 3559.8 (3272.9, 3871.8) | 1917.6 (1910.1, 1925.2)        | 1317.8 (1221.9, 1421.2) | 3575.9 (3558.1, 3593.7) | 3242.1 (2951.0, 3561.9) | 2661.0 (2645.7, 2676.3)        | 2152.6 (1977.6, 2343.0) |
| 2009 | 4376 (4364.7, 4387.4)   | 3509.6 (3225.8, 3818.4) | 1842.7 (1835.4, 1850.1)        | 1271.8 (1178.2, 1372.9) | 3257.0 (3240.2, 3273.9) | 2963.6 (2687.9, 3267.6) | 2397.0 (2382.6, 2411.5)        | 1947.0 (1782.4, 2126.9) |
| 2010 | 4333.1 (4321.8, 4344.3) | 3486.4 (3204.6, 3793.0) | 1783.8 (1776.6, 1791)          | 1235.5 (1143.7, 1334.6) | 3294.1 (3277.3, 3311.0) | 3006.2 (2729.5, 3310.9) | 2391.8 (2377.5, 2406.2)        | 1949.5 (1785.4, 2128.6) |
| 2011 | 4533.1 (4521.6, 4544.5) | 3659.3 (3370.3, 3973.0) | 1858.5 (1851.1, 1865.8)        | 1291.9 (1197.9, 1393.2) | 3419.3 (3402.2, 3436.4) | 3130.6 (2848.4, 3440.8) | 2481.1 (2466.6, 2495.7)        | 2030.3 (1862.8, 2212.9) |
| 2012 | 4225.0 (4214.0, 4236.0) | 3429.5 (3151.8, 3731.7) | 1691.3 (1684.4, 1698.3)        | 1183.3 (1094.2, 1279.6) | 2980.0 (2964.2, 2995.9) | 2749.2 (2487.3, 3038.7) | 2109.9 (2096.6, 2123.3)        | 1742.4 (1589, 1910.6)   |
| 2013 | 4070.3 (4059.5, 4081.0) | 3324.7 (3052.3, 3621.4) | 1606.5 (1599.7, 1613.2)        | 1132.3 (1045.7, 1226.2) | 3076.4 (3060.5, 3092.4) | 2858.6 (2591.8, 3152.7) | 2168.1 (2154.7, 2181.5)        | 1806.1 (1649.9, 1977.0) |
| 2014 | 4041.1 (4030.4, 4051.8) | 3319.2 (3047.4, 3615.2) | 1615.3 (1608.6, 1622.1)        | 1146.2 (1059.0, 1240.6) | 2824.4 (2809.2, 2839.6) | 2640.4 (2386.3, 2921.6) | 1957.5 (1944.9, 1970.2)        | 1642.8 (1495.3, 1804.9) |

|      |                         |                         |                         |                         |                         |                         |                         |                         |
|------|-------------------------|-------------------------|-------------------------|-------------------------|-------------------------|-------------------------|-------------------------|-------------------------|
| 2015 | 3825.7 (3815.4, 3836.1) | 3155 (2891.4, 3442.6)   | 1487.9 (1481.5, 1494.4) | 1061.1 (977.8, 1151.5)  | 2736.5 (2721.7, 2751.4) | 2564.9 (2316.2, 2840.3) | 1868.1 (1855.9, 1880.4) | 1573.0 (1429.8, 1730.6) |
| 2016 | 3952.1 (3941.7, 3962.6) | 3268.2 (3000.4, 3559.9) | 1560.6 (1554.1, 1567.2) | 1116.6 (1031.2, 1209.2) | 2739.0 (2724.4, 2753.8) | 2571.0 (2323.7, 2844.5) | 1855.5 (1843.4, 1867.6) | 1565.2 (1423.4, 1721.2) |
| 2017 | 3880.8 (3870.6, 3891.1) | 3230.6 (2965.5, 3519.4) | 1543.9 (1537.5, 1550.4) | 1113.6 (1028.5, 1205.7) | 2572.5 (2558.3, 2586.7) | 2423.5 (2185.3, 2687.8) | 1680.7 (1669.3, 1692.2) | 1424.2 (1290.2, 1572.3) |
| 2018 | 3794.8 (3784.7, 3804.9) | 3177.6 (2916.4, 3462.3) | 1494 (1487.6, 1500.3)   | 1085 (1001.6, 1175.4)   | 2530.3 (2516.4, 2544.3) | 2398.1 (2162.3, 2659.7) | 1574.9 (1563.9, 1585.9) | 1344.2 (1214.8, 1487.3) |
| Mean | 4298.8 (4295.8, 4301.8) | 3490.4 (3368.5, 3616.7) | 1777.8 (1775.9, 1779.7) | 1244.9 (1201.3, 1290.1) | 3164.7 (3160.4, 3169.1) | 2916.4 (2819.0, 3017.2) | 2256.6 (2252.9, 2260.3) | 1861.6 (1800.6, 1924.8) |

Supplementary Table 5: Estimated incidence of bacterial community-acquired pneumonia, pneumococcal pneumonia and acute suppurative otitis media according to age-group before and after implementation of 13-valent pneumococcal conjugate vaccine (PCV13) program in Ontario, 2005–2018

| Age group                                      | Incidence per 100,000 population (95% Confidence interval) |                            |
|------------------------------------------------|------------------------------------------------------------|----------------------------|
|                                                | Study estimate                                             |                            |
|                                                | Pre-PCV13 period                                           | PCV13 period               |
| <b>Bacterial community-acquired pneumonia</b>  |                                                            |                            |
| 0–4 years                                      | 238.7 (205.8, 276.9)                                       | 211.7 (189.9, 236.0)       |
| 5–17 years                                     | 38.7 (31.3, 47.9)                                          | 35.1 (29.9, 41.2)          |
| 18–39 years                                    | 28.0 (23.3, 33.7)                                          | 27.3 (24.0, 31.0)          |
| 40–64 years                                    | 59.1 (52.5, 66.4)                                          | 60.7 (56.1, 65.7)          |
| 65–74 years                                    | 175.8 (151.1, 204.5)                                       | 163.4 (148.5, 179.9)       |
| 75–84 years                                    | 379.1 (334, 430.3)                                         | 356.6 (327.0, 388.9)       |
| ≥85 years                                      | 762.8 (655.4, 887.8)                                       | 775.7 (709.0, 848.8)       |
| Total                                          | 90.8 (85.9, 96.0)                                          | 93.3 (89.8, 96.8)          |
| <b>Pneumococcal pneumonia, hospitalized</b>    |                                                            |                            |
| 0–4 years                                      | 4.1 (3.3, 5.1)                                             | 3.0 (2.4, 3.6)             |
| 5–17 years                                     | 0.8 (0.6, 1.1)                                             | 0.7 (0.6, 0.9)             |
| 18–39 years                                    | 1.4 (1.2, 1.6)                                             | 1.0 (0.9, 1.2)             |
| 40–64 years                                    | 4.5 (4.2, 4.9)                                             | 4.3 (4.1, 4.6)             |
| 65–74 years                                    | 10.8 (9.6, 12.1)                                           | 8.9 (8.1, 9.8)             |
| 75–84 years                                    | 14.6 (12.9, 16.5)                                          | 11.8 (10.6, 13.1)          |
| ≥85 years                                      | 20.0 (16.8, 23.9)                                          | 15.7 (13.6, 18.1)          |
| Total                                          | 4.1 (3.9, 4.3)                                             | 3.8 (3.6, 3.9)             |
| <b>Pneumococcal pneumonia, nonhospitalized</b> |                                                            |                            |
| 0–4 years                                      | 0.5 (0.3, 0.8)                                             | 0.4 (0.3, 0.6)             |
| 5–17 years                                     | 0.2 (0.1, 0.3)                                             | 0.1 (0.1, 0.1)             |
| 18–39 years                                    | 0.2 (0.2, 0.3)                                             | 0.2 (0.1, 0.2)             |
| 40–64 years                                    | 0.3 (0.3, 0.4)                                             | 0.3 (0.2, 0.3)             |
| 65–74 years                                    | 0.4 (0.3, 0.7)                                             | 0.3 (0.2, 0.5)             |
| 75–84 years                                    | 0.6 (0.4, 1.1)                                             | 0.6 (0.4, 0.8)             |
| ≥85 years                                      | 0.7 (0.3, 1.7)                                             | 0.8 (0.5, 1.2)             |
| Total                                          | 0.3 (0.3, 0.4)                                             | 0.3 (0.2, 0.3)             |
| <b>Acute suppurative otitis media</b>          |                                                            |                            |
| 0–4 years                                      | 15135.2 (14298.5, 16020.7)                                 | 12541.0 (12150.6, 12943.9) |
| 5–17 years                                     | 3449.2 (3219.0, 3696.0)                                    | 2916.2 (2804.0, 3032.9)    |
| 18–39 years                                    | 937.2 (850.7, 1032.5)                                      | 757.2 (717.3, 799.3)       |
| 40–64 years                                    | 773.7 (700.7, 854.4)                                       | 641.0 (607.2, 676.7)       |
| 65–74 years                                    | 695.9 (551.6, 877.8)                                       | 562.1 (500.6, 631.1)       |
| 75–84 years                                    | 665.1 (496.7, 890.5)                                       | 549.3 (469.7, 642.4)       |
| ≥85 years                                      | 574.0 (336.6, 979.1)                                       | 482.7 (373.9, 623.3)       |
| Total                                          | 2019.3 (1947.4, 2093.8)                                    | 1616.7 (1584.4, 1649.6)    |

Abbreviation: PCV13, the 13-valent pneumococcal conjugate vaccine

Supplementary Table 6: Incidence of bacterial community-acquired pneumonia, pneumococcal pneumonia and acute suppurative otitis media according to age-group before and after implementation of 13-valent pneumococcal conjugate vaccine (PCV) program in British Columbia, 2005–2018

| Age group                                      | Incidence per 100,000 population (95% Confidence interval) |                            |
|------------------------------------------------|------------------------------------------------------------|----------------------------|
|                                                | Study estimate                                             |                            |
|                                                | Pre-PCV13 period                                           | PCV13 period               |
| <b>Bacterial community-acquired pneumonia</b>  |                                                            |                            |
| 0–4 years                                      | 607.4 (593.3, 621.9)                                       | 731.3 (719.4, 743.5)       |
| 5–17 years                                     | 209.8 (205.0, 214.7)                                       | 276.3 (271.9, 280.7)       |
| 18–39 years                                    | 136.0 (133.3, 138.8)                                       | 195.6 (193.1, 198.1)       |
| 40–64 years                                    | 240.9 (237.6, 244.2)                                       | 442.7 (439.3, 446.1)       |
| 65–74 years                                    | 553.9 (543.1, 565.0)                                       | 1063.8 (1053.6, 1074.2)    |
| 75–84 years                                    | 1072.0 (1053.3, 1091.1)                                    | 2135.6 (2115.7, 2155.7)    |
| ≥85 years                                      | 2230.1 (2186.2, 2274.8)                                    | 4593.9 (4549.6, 4638.7)    |
| Total                                          | 324.9 (322.6, 327.2)                                       | 596.6 (594.2, 599)         |
| <b>Pneumococcal pneumonia, hospitalized</b>    |                                                            |                            |
| 0–4 years                                      | 4.0 (3.0, 5.4)                                             | 4.6 (3.7, 5.6)             |
| 5–17 years                                     | 1.3 (0.9, 1.7)                                             | 1.6 (1.3, 2.0)             |
| 18–39 years                                    | 3.1 (2.7, 3.6)                                             | 2.1 (1.9, 2.4)             |
| 40–64 years                                    | 7.2 (6.7, 7.8)                                             | 6.3 (5.9, 6.7)             |
| 65–74 years                                    | 14.4 (12.7, 16.3)                                          | 10.3 (9.4, 11.4)           |
| 75–84 years                                    | 19.9 (17.5, 22.6)                                          | 15.3 (13.7, 17.1)          |
| ≥85 years                                      | 26.8 (22.4, 32.1)                                          | 18.8 (16.1, 21.9)          |
| Total                                          | 6.5 (6.2, 6.8)                                             | 5.5 (5.2, 5.7)             |
| <b>Pneumococcal pneumonia, nonhospitalized</b> |                                                            |                            |
| 0–4 years                                      | 64.4 (59.9, 69.2)                                          | 69.3 (65.7, 73.1)          |
| 5–17 years                                     | 28.1 (26.4, 29.9)                                          | 27.9 (26.5, 29.4)          |
| 18–39 years                                    | 21.2 (20.2, 22.3)                                          | 18.9 (18.2, 19.7)          |
| 40–64 years                                    | 39.1 (37.8, 40.4)                                          | 40.5 (39.5, 41.5)          |
| 65–74 years                                    | 85.2 (81.0, 89.6)                                          | 91.8 (88.8, 94.8)          |
| 75–84 years                                    | 143.9 (137.1, 151.0)                                       | 161.6 (156.2, 167.2)       |
| ≥85 years                                      | 263.7 (248.9, 279.3)                                       | 332.0 (320.2, 344.2)       |
| Total                                          | 46.2 (45.4, 47.1)                                          | 51.2 (50.5, 51.9)          |
| <b>Acute suppurative otitis media</b>          |                                                            |                            |
| 0–4 years                                      | 15854.1 (15781.3, 15927.2)                                 | 11232.5 (11185.5, 11279.8) |
| 5–17 years                                     | 6017.8 (5992.1, 6043.6)                                    | 4657.9 (4639.7, 4676.2)    |
| 18–39 years                                    | 1594.7 (1585.3, 1604.1)                                    | 1109.9 (1103.9, 1115.9)    |
| 40–64 years                                    | 1276.8 (1269.2, 1284.5)                                    | 934.7 (929.8, 939.7)       |
| 65–74 years                                    | 1142.8 (1127.2, 1158.7)                                    | 861.2 (852.0, 870.6)       |
| 75–84 years                                    | 1158.1 (1138.7, 1178.0)                                    | 843.0 (830.6, 855.7)       |
| ≥85 years                                      | 1178.6 (1146.8, 1211.2)                                    | 790.1 (771.9, 808.8)       |
| Total                                          | 2775.8 (2769.0, 2782.5)                                    | 1957.7 (1953.4, 1962.0)    |

Abbreviation: PCV13, the 13-valent pneumococcal conjugate vaccine



Supplementary Figure 1: Annual incidence of pneumococcal pneumonia in: (A) Ontario (B) British Columbia, 2005–2018

Supplementary Figure 2: Age group-specific incidence of pneumococcal pneumonia before and after implementation of 13-valent pneumococcal conjugate vaccine (PCV13) program in: (A) Ontario (B) British Columbia, 2005–2018
